# Supplementary material
Source: bioRxiv or medRxiv preprint supplement (https://www.biorxiv.org/highwire/filestream/119002/field_highwire_adjunct_files/4/392373-5.pdf)

Table S14A. Membrane proteins determined by SignalP4.1/Kyte-Doolittle/Phobius

| Protein   | SignalP 1.4 (Default optimized D-cutoff value)                                                                                                                                                                                                                                                      | Kyte Doolittle (window size = 19)                                                                                                                                                                | Phobius                                                                                                                                                                                                                                               |
|-----------|-----------------------------------------------------------------------------------------------------------------------------------------------------------------------------------------------------------------------------------------------------------------------------------------------------|--------------------------------------------------------------------------------------------------------------------------------------------------------------------------------------------------|-------------------------------------------------------------------------------------------------------------------------------------------------------------------------------------------------------------------------------------------------------|
| YCL048W-A | <p>SignalP-4.1 prediction (euk networks): SP522</p> 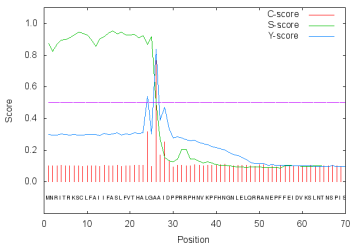 <p>Score</p> <p>Position</p> <p>C-score<br/>S-score<br/>Y-score</p> <p>IKWITRISCLPAI I FAEI PVT HA LQAA I D PRRPRHW KFFRSDI E LQGRARE PPF EI KV LNT NP FT</p> | <p>ProtScale output for user_sequence</p> <p>Hphob. / Kyte &amp; Doolittle</p>  <p>Score</p> <p>Position</p>   | <p>Phobius posterior probabilities for YCL048W-A</p>  <p>Posterior label probability</p> <p>transmembrane — cytoplasmic — non cytoplasmic — signal peptide —</p>   |
| YCR011C   | <p>SignalP-4.1 prediction (euk networks): ADP1</p>  <p>Score</p> <p>Position</p> <p>C-score<br/>S-score<br/>Y-score</p> <p>MSHRNLYYS LL FLLLSGVV LA KDKYF PF FEET SSANRLLT AGDQMDIC PFC FICGLPI F ECKDHF</p>       | <p>ProtScale output for user_sequence</p> <p>Hphob. / Kyte &amp; Doolittle</p>  <p>Score</p> <p>Position</p>   | <p>Phobius posterior probabilities for YCR011C</p>  <p>Posterior label probability</p> <p>transmembrane — cytoplasmic — non cytoplasmic — signal peptide —</p>     |
| YDR524C-B | <p>SignalP-4.1 prediction (euk networks): YDR524C-B</p>  <p>Score</p> <p>Position</p> <p>C-score<br/>S-score<br/>Y-score</p> <p>MDFKT I VAA FATV AAVGARNV ST MSRRITMSMT T ST KI ST GAARNLQGV PSDAVAKGV A FLF</p> | <p>ProtScale output for user_sequence</p> <p>Hphob. / Kyte &amp; Doolittle</p>  <p>Score</p> <p>Position</p> | <p>Phobius posterior probabilities for YDR524C-B</p>  <p>Posterior label probability</p> <p>transmembrane — cytoplasmic — non cytoplasmic — signal peptide —</p> |
| YEL001C   | <p>SignalP-4.1 prediction (euk networks): IRC22</p>  <p>Score</p> <p>Position</p> <p>C-score<br/>S-score<br/>Y-score</p> <p>IKPML I GPNL L I A LKSPCAA I SANRSDV SMDQVSAV PPI IKLEYVDVQKEDND E FL EPYAL</p>      | <p>ProtScale output for user_sequence</p> <p>Hphob. / Kyte &amp; Doolittle</p>  <p>Score</p> <p>Position</p> | <p>Phobius posterior probabilities for IRC22</p>  <p>Posterior label probability</p> <p>transmembrane — cytoplasmic — non cytoplasmic — signal peptide —</p>     |

Table S14A. Membrane proteins determined by SignalP4.1/Kyte-Doolittle/Phobius

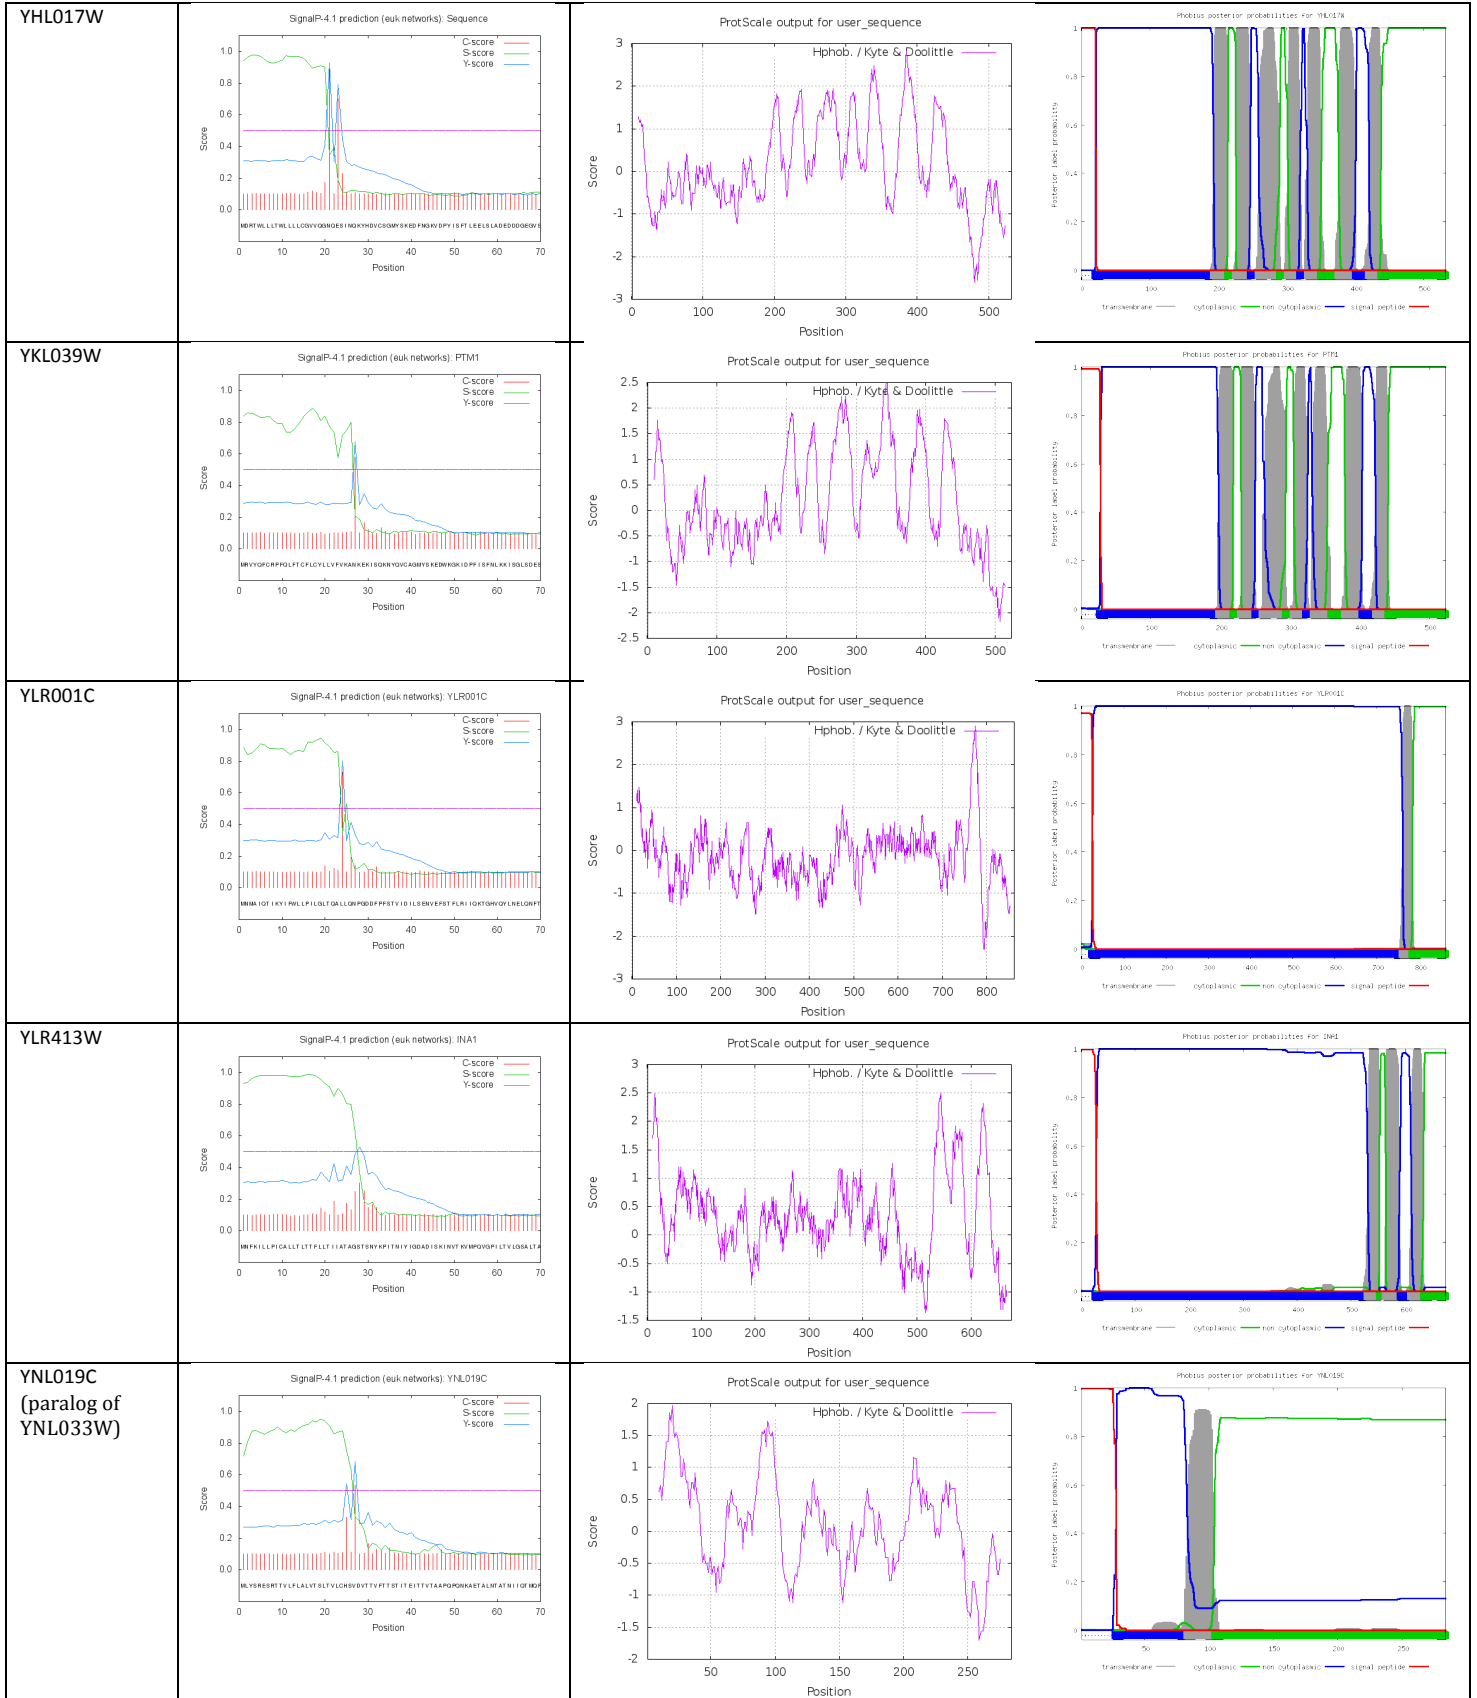

Table S14A. Membrane proteins determined by SignalP4.1/Kyte-Doolittle/Phobius

|                                             |                  |           |           |
|---------------------------------------------|------------------|-----------|-----------|
| <p>YNL033W<br/>(paralog of<br/>YNL019C)</p> |                  |           |           |
| <p>YOR008C-A</p>                            |                  |           |           |
| <p>YBR200W-A</p>                            | <p>uncleaved</p> | <p>NA</p> | <p>NA</p> |
| <p>YDL237W</p>                              | <p>uncleaved</p> | <p>NA</p> | <p>NA</p> |
| <p>YDR032C</p>                              | <p>uncleaved</p> | <p>NA</p> | <p>NA</p> |
| <p>YDR053W</p>                              | <p>uncleaved</p> | <p>NA</p> | <p>NA</p> |

Table S14A. Membrane proteins determined by SignalP4.1/Kyte-Doolittle/Phobius

|           |                                                                          |    |    |
|-----------|--------------------------------------------------------------------------|----|----|
|           | <p>SignalP-4.1 prediction (euk.networks): YDR053W</p>                    |    |    |
| YDR246W-A | <p>uncleaved</p> <p>SignalP-4.1 prediction (euk.networks): YDR246W-A</p> | NA | NA |
| YDR366C   | <p>Uncleaved</p> <p>SignalP-4.1 prediction (euk.networks): YDR366C</p>   | NA | NA |
| YER067W   | <p>uncleaved</p> <p>SignalP-4.1 prediction (euk.networks): R011</p>      | NA | NA |
| YFR012W-A | <p>uncleaved</p> <p>SignalP-4.1 prediction (euk.networks): YFR012W-A</p> | NA | NA |
| YHL042W   | <p>uncleaved</p>                                                         | NA | NA |

Table S14A. Membrane proteins determined by SignalP4.1/Kyte-Doolittle/Phobius

|           |                         |    |    |
|-----------|-------------------------|----|----|
|           |                         |    |    |
| YJR120W   | <p><b>uncleaved</b></p> | NA | NA |
| YKL018C-A | <p><b>uncleaved</b></p> | NA | NA |
| YKR044W   |                         | NA | NA |
| YMR272W-B | <p><b>uncleaved</b></p> | NA | NA |
| YMR315W-A | <p><b>uncleaved</b></p> | NA | NA |

Table S14A. Membrane proteins determined by SignalP4.1/Kyte-Doolittle/Phobius

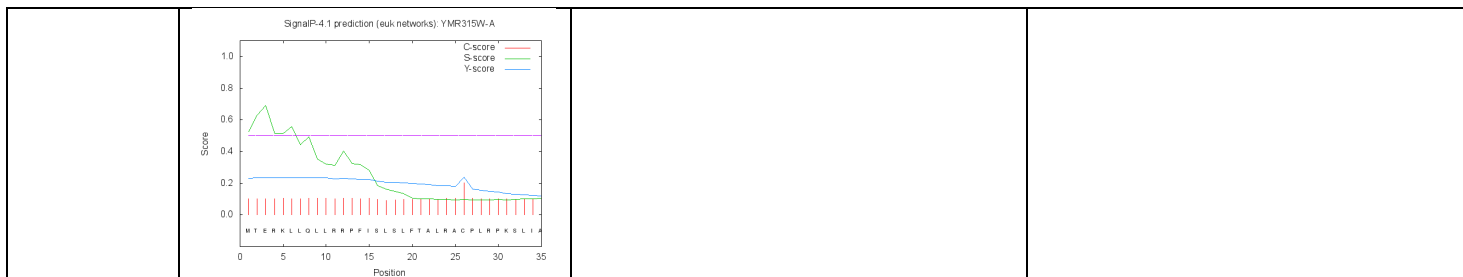

Supplement: Supplementary file [file 392373-5.pdf]
